# Hydraulic synchrony of spawning sites amongst Earth's riverine fishes

Antóin M. O'Sullivan<sup>\*1,2</sup>, Alexander M. Morgan<sup>1,3,4</sup>, Robert Newbury<sup>1</sup>, Tommi Linnansaari<sup>1,2,3</sup>,  
Barret L. Kurylyk<sup>5</sup>, Jani Helminen<sup>6</sup>, Bernhard Wegscheider<sup>7</sup>, Robert C. Johns<sup>8</sup>, Kurt Samways<sup>1,9</sup>,  
Kari I. Alex<sup>10</sup>, R. Allen Curry<sup>1,2,3</sup>, and Richard A. Cunjak<sup>1,2,3</sup>

<sup>1</sup> Canadian Rivers Institute, University of New Brunswick (New Brunswick, Canada)

<sup>2</sup> FOREM, University of New Brunswick (New Brunswick, Canada)

<sup>3</sup> Biology, University of New Brunswick (New Brunswick, Canada)

<sup>4</sup> Physics, University of New Brunswick (New Brunswick, Canada)

<sup>5</sup> Civil and Resource Engineering, Dalhousie University (Nova Scotia, Canada)

<sup>6</sup> Fish and Water Research Ltd. (Klaukkala, Finland)

<sup>7</sup> Institute of Ecology and Evolution, Wyss Academy for Nature, University of Bern (Bern, Switzerland)

<sup>8</sup> Atlantic Forestry Centre, Canadian Forest Service, Natural Resources Canada (New Brunswick, Canada)

<sup>9</sup> Biology, University of New Brunswick (New Brunswick, Canada)

<sup>10</sup> Okanagan Nation Alliance Fisheries Department (British Columbia, Canada)

## ORCIDiS

- Antóin M. O'Sullivan - 0000-0003-0599-887X
- Tommi Linnansaari - 0000-0002-8594-3838
- Jani Helminen - [0000-0001-7358-8341](https://orcid.org/0000-0001-7358-8341)
- Rob C. Johns – 000-0002-8936-7735

27 \*corresponding author: Antóin M. O’Sullivan ([aosulliv@unb.ca](mailto:aosulliv@unb.ca))

## 28 **Abstract**

29 Earth’s riverine fishes utilize a suite of reproductive guilds, broadly following four guilds: nest  
30 guarders, broadcast pelagic spawners, broadcast benthic spawners and nest non-guarders<sup>1,2</sup>, and  
31 these guilds utilize different mechanisms to aerate eggs<sup>3,4</sup>. Globally, river fishes populations are  
32 declining<sup>5</sup>, and spawning habitat rehabilitation has become a popular tool to counter these  
33 declines<sup>6</sup>. However, there is a lack of understanding as to what classifies suitable spawning  
34 habitats for riverine fishes, thereby limiting the efficacy of these efforts and thus the restoration  
35 of the target species. Using data from  $n = 220$  peer-reviewed papers and examining  $n = 128$   
36 unique species, we show the existence of a hydraulic pattern (defined by Froude number ( $Fr$ ), a  
37 non-dimensional hydraulic parameter) that characterizes the reproductive guilds of riverine  
38 fishes. We found nest guarders, broadcast pelagic spawners, benthic spawners, and nest non-  
39 guarders selected sites with mean  $Fr = 0.05, 0.11, 0.22, \text{ and } 0.28$ , respectively. Some of the  
40 fishes in this study are living fossils, suggesting that that these hydraulic preference patterns may  
41 be consistent across time. Our results suggest this hydraulic pattern can guide spawning habitat  
42 rehabilitation for all riverine fish species globally in absence of specific spawning habitat  
43 information for a species, where resource managers can establish the reproductive guild of the  
44 species of interest, and then apply the specific hydraulic requirements ( $Fr$  range) of that  
45 reproductive guild, as presented herein, in the rehabilitation of the target species.

46

47

48

49

50

51

52

53

54

55 **Main**

56 Throughout the year Earth's rivers pulse as their fishes spawn to complete their life cycle, thus  
57 ensuring the continued success of their respective species. Their selection of spawning sites is  
58 based on reproductive guilds, and these broadly (but not exclusively) follow four guilds<sup>1,2</sup>: (i)  
59 nest builders that guard their nest (nest - guarder), *e.g.*, smallmouth bass (*Micropterus dolomieu*),  
60 (ii) nest builders that do not guard their nest (nest non-guarder), *e.g.*, Dwarf Ayu (*Plecoglossus*  
61 *altivelis*), (iii) broadcast pelagic spawners – fishes that spawn in the water column (broadcast -  
62 pelagic), *e.g.*, Darling River hardyhead (*Craterocephalus amniculus*) and (iv) broadcast benthic  
63 spawners – fishes that broadcast spawn onto substrates (broadcast - benthic)), *e.g.*, American  
64 paddlefish (*Polyodon spathula*). Regardless of the guild, a key to maturation and hatching of  
65 these eggs is adequate oxygenation<sup>3,4</sup> – see Fig. 1. Nest builders, for instance, fan their nests to  
66 aerate their eggs, whereas nest non-guarders will create a nest that modulates river flow to aerate  
67 their eggs<sup>7</sup>.

68 Earth's riverine fishes are experiencing steep declines<sup>5</sup>. The reasons for this are  
69 multifaceted and linked to habitat degradation, dams, overharvest, introduction of non-native  
70 species, and climate change<sup>8,9</sup>. With these declines, we are on the cusp of losing myriad species  
71 and the critical ecosystem functions and services they provide. To counter these declines,  
72 governmental and non-profit groups are turning to spawning habitat restoration<sup>6,10</sup>. While this  
73 is a laudable aim, there is a lack of understanding as to what classifies suitable spawning habitats  
74 for riverine fishes, and it is infeasible to find this explicitly out for every riverine fish species.  
75 This knowledge gap serves to limit the efficacy of these efforts and thus the restoration of the  
76 target species. We hypothesize that a hydraulic pattern exists in the spawning habitats of Earth's  
77 riverine fishes, and this pattern can guide spawning habitat rehabilitation in absence of species-  
78 specific information. We select Froude number ( $Fr$ ) as a non-dimensional hydraulic parameter  
79 that is comparable across all spatial scales, and has shown promise in previous studies examining  
80 detailed spawning characteristics (*e.g.*,<sup>10,11</sup>).  $Fr$  is simply a ratio of inertial to gravity forces (see  
81 methods), and describes the river's hydraulic energy regime. We postulate, *a priori*, that low  $Fr$   
82 values characterize the spawning habitats of nest guarders, where oxygenation of the eggs is  
83 provided by the parent. This energetically costly guild motivates the selection of a hydraulic  
84 regime that limits energetic expenditure associated with swimming (Fig. 1). Conceptually, as the  
85 reproductive guild changes, the hydraulic regime required to aerate the eggs is also predicted to

86 change. For instance, broadcast pelagic spawners that spawn semi-buoyant eggs are  
87 hypothesized to select different hydraulic regimes than broadcast benthic spawners that spawn  
88 adhesive eggs (Fig. 1). Contrastingly, we hypothesize that nest-non guarders select relatively  
89 higher  $Fr$  values to limit sedimentation accumulation in the nest that would reduce natural  
90 oxygenation (Fig. 1). To test our hypotheses, we conducted a meta-analysis of  $n = 220$  peer-  
91 reviewed papers that describe depth and velocity conditions, and thereby  $Fr$ , at the spawning  
92 sites of  $n = 128$  unique riverine fishes across the planet (Fig. 2a and Tables S1 and S2). These  
93 data include each of the four reproductive guilds detailed above (Fig. 1 and 2).

94

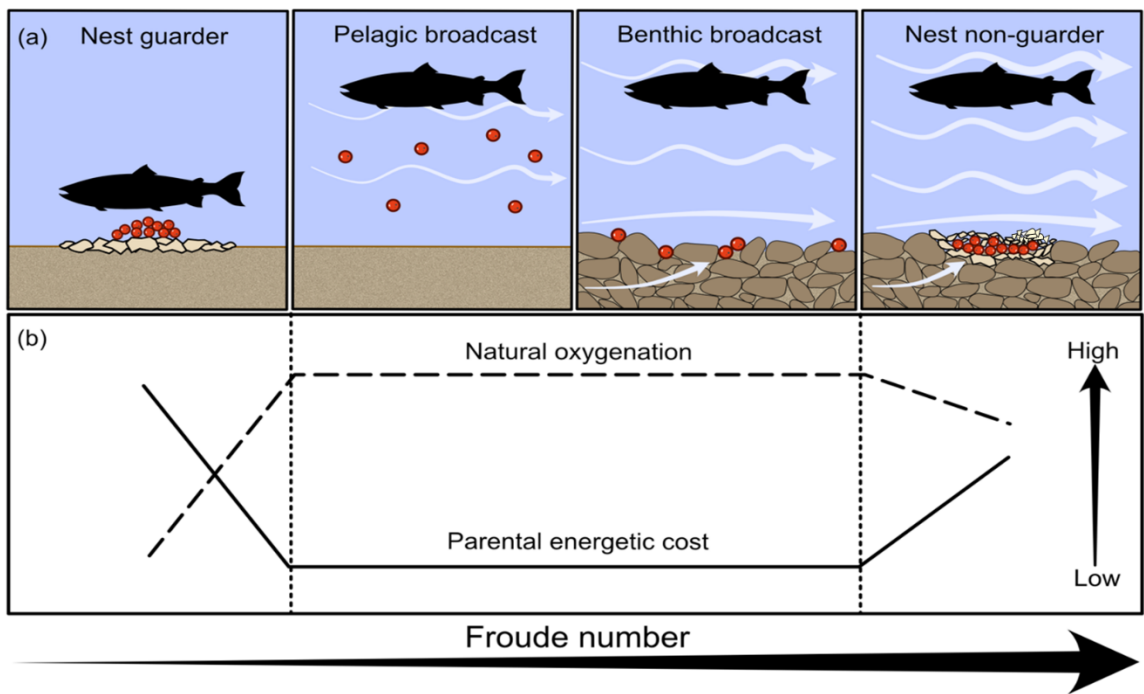

95

96 **Fig. 1** The conceptual model illustrating our hypothesized relationship between global  
97 reproductive guilds and Froude number. A schematic of global riverine reproductive guilds (a),  
98 and their hypothesized relationship with oxygenation, and parental energetic investment in  
99 incubation (b) as a function of Froude number.

100

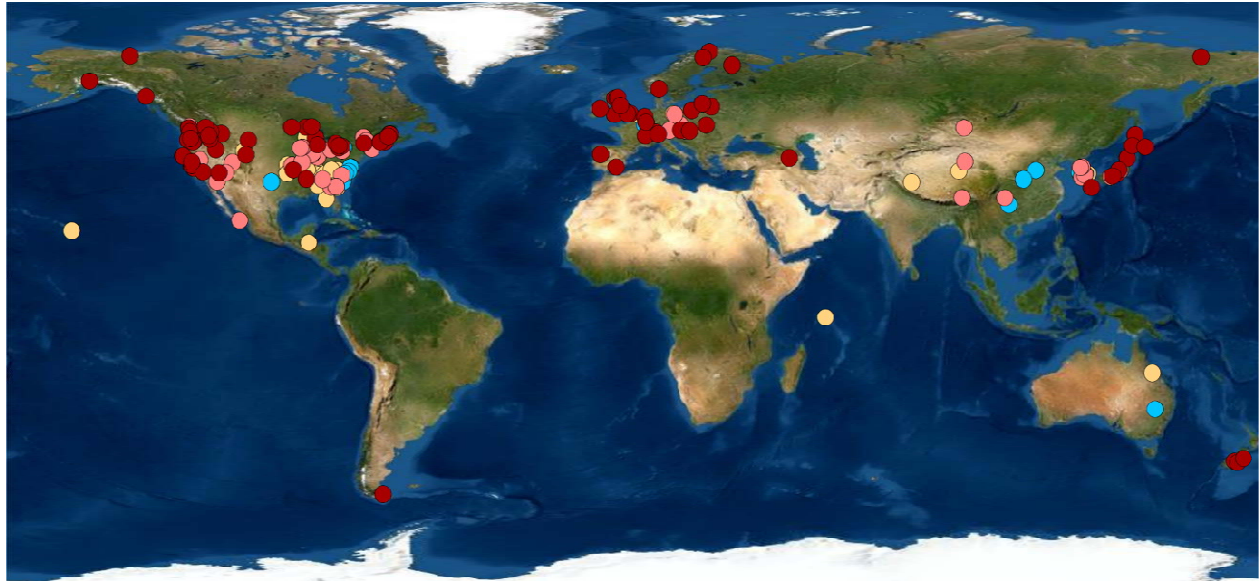

|                        | Nest guarder  | Broadcast pelagic  | Broadcast benthic  | Nest non-guarder  | Total |
|------------------------|------------------------------------------------------------------------------------------------|-----------------------------------------------------------------------------------------------------|-------------------------------------------------------------------------------------------------------|------------------------------------------------------------------------------------------------------|-------|
| No. of samples ( $n$ ) | 34                                                                                             | 18                                                                                                  | 61                                                                                                    | 107                                                                                                  | 220   |
| No. of species ( $n$ ) | 31                                                                                             | 13                                                                                                  | 44                                                                                                    | 40                                                                                                   | 128   |

101  
102 **Fig. 2** Spatial extent of the data underlying our analysis displaying reproductive guild  
103 classification (color), sample size and number of unique species, and the total number of samples  
104 for each reproductive guild.

105  
106 **Results and Discussion**

107 Globally,  $Fr$  values indicate an association with reproductive guilds that was not evident in depth  
108 or velocity (Fig. 3). Nest guarders, broadcast pelagic spawners, benthic spawners, and nest non-  
109 guarders selected sites with mean  $Fr$  numbers of 0.05, 0.11, 0.22, and 0.28, respectively (Fig. 3).  
110 We acknowledge that we observed between-population variability within species in the  $Fr$  at  
111 their spawning location. This means that the  $Fr$  at selected spawning sites is not necessarily a  
112 “crisp” number and some inherent variability is assumed. However, we tested the validity of the  
113 observed patterns in  $Fr$  by examining species specific  $Fr$  estimates (*i.e.*, for multiple single  
114 species observations, we reduced the parameter of interest to the mean of the total observations),  
115 and the results remain the same (see methods and Fig. 3a-c and d-f). As such, our meta-analysis  
116 supports the hypothesis, and conceptual model, that a hydraulic pattern, as represented by  $Fr$ , is  
117 apparent from the reproductive guilds of Earth’s riverine fishes (Figs. 1 and 3.).

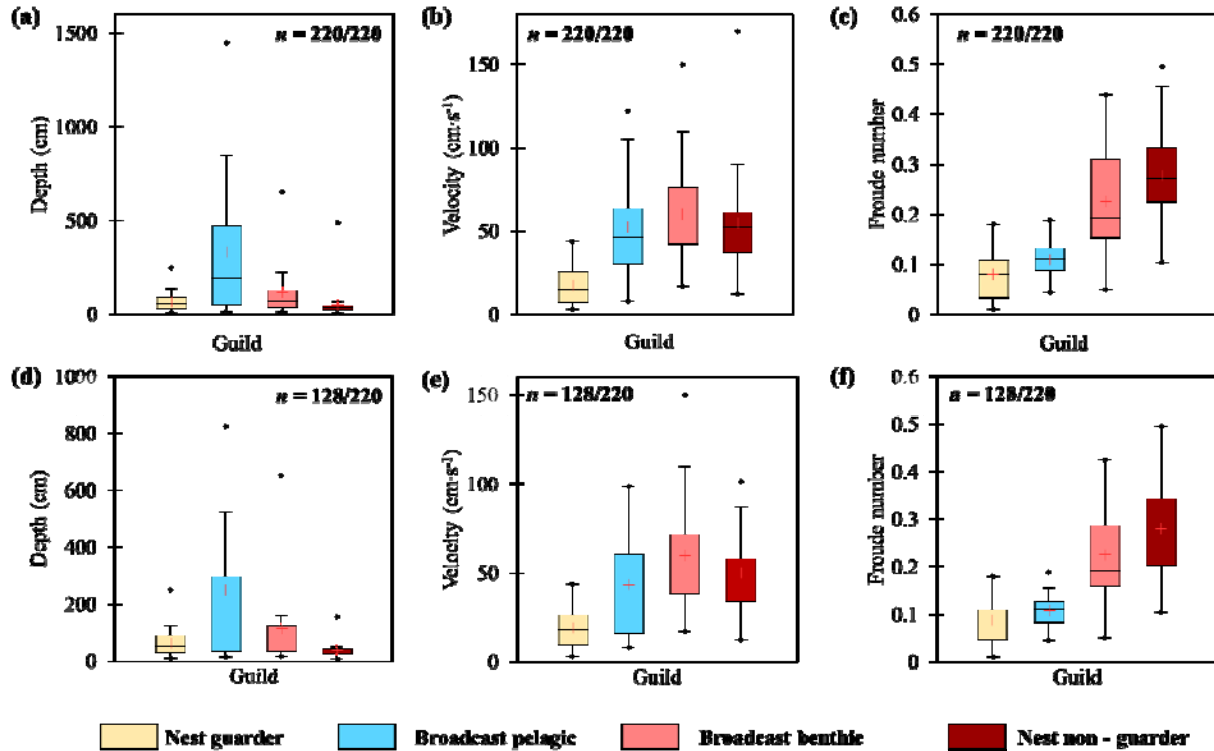

119

120 **Fig. 3** Descriptive statistics results illustrating the relationship between depth, velocity and  
121 Froude number values for nest guarders, broadcast pelagic, broadcast benthic, and nest non-  
122 guarding reproductive guilds stratified as per our conceptual model (Fig. 1) for the entire data set  
123 ( $n = 220$ ) (a-c), and unique species ( $n = 128$ ) (d-f).

124

125 Nest guarders selected sites with the lowest  $Fr$  values observed across the  $n = 128$  species  
126 examined. Nest guarders, such as the eel tailed catfish (*Tandanus tandanus*), are uniquely  
127 characterized in our dataset by a parent that protects and aerates the nest. It is well established  
128 that providing parental care is energetically costly, with links to reduced parental growth<sup>12</sup>.  
129 Biotic interactions by predators can further exacerbate energetic costs for nest guarders (e.g.,  
130 smallmouth bass (*Micropterus dolomieu*) and round goby (*Neogobius melanostomus*) – see<sup>13</sup>).  
131 We investigated the role of  $Fr$  on energetic expenditure for nest guarders using an integrated  
132 Froude number – Strouhal number model ( $Fr-St$ ), where  $St$  is a dimensionless number that  
133 describes oscillating flow mechanisms. Considering nest guarders fan their nest to remove fine  
134 sediments and aerate their eggs, we assume  $St = 0.3$  as this provides the greatest propulsion to  
135 entrain particles and aerate eggs (e.g.,<sup>14,15</sup>). Examining the relationship between  $Fr$  and tail-beat

136 frequency ( $f$ ) reveals the energetic expenditure required to obtain optimal  $St$  – see methods. The  
137  $Fr$ - $St$  model suggests  $Fr$  values selected by nest guarders are energetically more efficient than  
138 the other reproductive guilds (see  $f$  values in Table 1). We thus propose the global occurrence of  
139 low  $Fr$  values for nest guarders is linked to energetic conservation of the parent, facilitating  
140 removal of fine sediments and aerating eggs in the most energetically efficient manner.

141

142 **Table 1** Integrated Froude number ( $Fr$ ) and Strouhal number ( $St$ ) model results for different  $Fr$   
143 scenarios associated with each reproductive guild quantifying how an increase in  $Fr$  while  
144 retaining an optimal  $St = 0.3$ <sup>15</sup>, leads to an increase in tail beat frequency  $f$  (see SI for full model).

| Reproductive guild |                     |                          |                          |                          |
|--------------------|---------------------|--------------------------|--------------------------|--------------------------|
|                    | <i>Nest guarder</i> | <i>Broadcast pelagic</i> | <i>Broadcast benthic</i> | <i>Nest non- guarder</i> |
| $Fr$               | 0.08                | 0.11                     | 0.22                     | 0.28                     |
| $St$               | 0.3                 | 0.3                      | 0.3                      | 0.3                      |
| $f$ ( $s^{-1}$ )   | 1.6                 | 2.2                      | 4.3                      | 5.5                      |

145

146 The role of hydraulics for the remaining three reproductive guilds is markedly different  
147 from nest guarders. When broadcast pelagic spawners spawn in the water column, their eggs can  
148 either settle onto vegetation or drift, *e.g.*, common bream (*Abramis brama*) and black carp  
149 (*Mylopharyngodon piceus*), respectively. For species whose eggs are deposited on vegetation,  
150  $Fr$  values of  $\sim 0.11$  likely produce an environment that aerates the eggs, while the presence of the  
151 vegetation limits shear stress and egg entrainment<sup>16</sup>. For species that spawn directly into the  
152 water column, we hypothesize a different link between the egg and the hydraulics. Here, we use  
153 striped bass (*Morone saxatilis*) as an example. Upon fertilization, the semi-buoyant striped bass  
154 eggs drift in the water column, with eggs becoming denser as they grow<sup>17,18</sup>. In still water, ergo  
155 with little drag force, these denser eggs will sink, reducing survival<sup>19</sup>. As such, we suggest the  
156 selection of  $Fr \sim 0.11$  for this guild provides adequate flow to entrain the eggs, and as the egg  
157 density increases, this hydraulic condition facilitates the egg staying buoyant, *i.e.*, prevent  
158 complete sinking, and allows time for the egg to hatch (Fig. 1).

159

160 The hydraulic controls on nest building non-guarders' site selection have been well  
161 studied<sup>20,21</sup>. Salmonid redds, for instance, are understood to induce hyporheic flow paths (blue  
162 arrows Fig. 1) that remove fine sediments and metabolic by-products, while also aerating eggs,  
163 and creating a stable thermal environment<sup>22</sup>. These same mechanisms most likely transcend to  
164 other nest building non-guarders, such as sea lamprey (*Petromyzon marinus*) – see Table S1.  
165 However, less is understood about the role of hydraulics for broadcast benthic spawners, such as  
166 the robust redhorse (*Moxostoma robustum*) and alligator gar (*Atractosteus spatula*). Given both  
167 nest non-guarders and broadcast benthic spawners select gravel and cobble substrata, and the *Fr*  
168 values for both are the highest across the reproductive guilds, we postulate a similar hydraulic  
169 mechanism in both instances. Nonetheless, the difference in *Fr* for each guild does suggest  
170 subtle mechanistic differences. Broadcast benthic spawners eggs are typically adhesive<sup>1</sup>. The  
171 eggs of Asp (*Leuciscus aspius*), for instance, are both negatively buoyant and adhesive<sup>23</sup>. It is  
172 also well documented that benthic spawner eggs drop into interstitial voids<sup>6,24</sup>. For broadcast  
173 benthic spawners (that spawn on complex bedforms with high hydraulic conductivity (*K*)  
174 substrate), we hypothesize the following: (a) *Fr* values ~ 0.22 induce hyporheic flows in the  
175 uppermost section of the substrate<sup>25</sup>; and (b) the adhesive nature of the eggs offsets shear stress  
176 and uplift from the bulk flow and hyporheic flow, respectively, thus defining a different guild to  
177 exploit the hydraulics in comparison to nest non-guarders (Fig. 1). Similarly, nest non-guarders  
178 typically select spawning habitats that are also characterized by complex bedforms with high *K*  
179 sediments, and these induce hyporheic flow<sup>26</sup>. However, nest building non-guarders are  
180 suggested to select sites with higher *Fr* values (Fig. 3). Nest building non-guarders do not  
181 typically have adhesive eggs and will bury their eggs post fertilization in a redd *e.g.*, brook trout  
182 (*Salvelinus fontinalis*) and barbel (*Barbus barbus*). We hypothesize the following for the  
183 suggested higher *Fr* values (a) higher *Fr* values will entrain fine sediments during nest  
184 construction, and this winnowing is understood to change *K* and thereby down and upwelling  
185 flux<sup>22</sup>, and (b) as the eggs of nest building non-guarders are buried, higher *Fr* values are likely  
186 required to increase oxygen in the nest<sup>27</sup>.

187

188 Some of the fishes in this study can be considered living fossils. The lamprey  
189 (*Petromyzontiformes*) and the American paddlefish (*Polyodon spathula*) have existed since the  
190 Early Cretaceous<sup>28,29</sup>, as such we hypothesize that that these hydraulic preference patterns with



191 reproductive guilds may be consistent across time. This simple  $Fr$  model foregoes consideration  
192 of many other important factors, including temperature and nutrients<sup>30,31</sup>. For instance,  
193 groundwater upwelling may provide both aeration and thermal stability for eggs, thus limiting  
194 the requirement to select specific hydraulics, *e.g.*,<sup>32</sup>. However, the simple  $Fr$  model presented  
195 herein for four reproductive guilds does provide compelling evidence that the hydraulics that  
196 underpin the spawning habitats of the Earth's fishes are best characterized by  $Fr$ . The success of  
197 utilizing  $Fr$  values to rehabilitating spawning habitat is already evident in some rivers. Sockeye  
198 salmon (*Oncorhynchus nerka*), for instance, have been observed to select spawning habitats with  
199  $Fr = 0.32 (\pm 0.1)^{10}$ . Sockeye spawning habitat in the Okanagan River (British Columbia, Canada)  
200 was severely degraded in the 1950's when > 90 % of the river was straightened and dyked<sup>33</sup>.  
201 Between 2014 - 2018, the channelized river was modified with spawning platforms designed to  
202 meet  $0.2 \leq Fr \leq 0.4$  during the spawning autumn period<sup>34</sup>. These spawning platforms have been  
203 utilized by sockeye salmon each year post-construction and have become a critical tool in  
204 rehabilitating sockeye salmon. The main finding of the work presented herein is that while it is  
205 unfeasible to describe in detail the spawning habitat requirements for all approximately 15 000  
206 freshwater fish species<sup>35</sup>, it may be sufficient to first establish the reproductive guild of the  
207 species of interest, and then apply suitable target  $Fr$  range, as presented herein, in rehabilitation  
208 to meet specific hydraulic requirements of the target species. Future conservation and/or  
209 restoration projects that target spawning habitat would therefore benefit from utilizing the link  
210 between reproductive guild and  $Fr$  range.

211

## 212 **Methods**

### 213 **Meta-analysis data search**

214 We conducted searches in multiple article databases using several different search terms to  
215 acquire as many peer-reviewed papers as possible. The search terms and database developed for  
216 this study are available in the supplementary information as an .xlsx file.

### 217 ***Froude number model***

218 Froude number ( $Fr$ ) is a non-dimensional hydrodynamic parameter that is calculated by:

$$219 \quad Fr = \frac{V}{\sqrt{gD}} \quad (1)$$

220 where  $V$  is water velocity ( $\text{m}\cdot\text{s}^{-1}$ ),  $g$  is the gravitational constant =  $9.81 \text{ m}\cdot\text{s}^{-2}$  and  $D$  is depth (m).

221

## 222 ***Integrated Froude number – Strouhal number model***

223 A Strouhal number ( $St$ ) is a non-dimensional hydrodynamic parameter that describes oscillating  
224 flow mechanisms or vortex shedding in a fluid. Myriad experiments have shown that optimal  $St$   
225 values for swimming animals, defined by maximum propulsive efficiency, range from 0.25 to  
226 0.35 (Taylor *et al.*, 2003). For fishes,  $St$  can be calculated by (Eloy, 2011):

$$227 \quad St = \frac{fA}{V} \quad (2)$$

228 where  $f$  is the tail-beat frequency ( $s^{-1}$ ),  $A$  is the peak-to-peak tail amplitude (m), and  $V$  is water  
229 velocity ( $m \cdot s^{-1}$ ).

230 The  $f$  term can be isolated by rearranging equations (1) and (2), yielding the following form for  
231 the integrated Froude number – Strouhal number mode ( $Fr-St$ ):

$$232 \quad f = \frac{Fr \cdot St \cdot \sqrt{gD}}{A} \quad (3)$$

## 233 ***Descriptive statistics***

234 We used univariate box plots to examine the relationship each hydraulic parameter and our  
235 reproductive guild conceptual model. To account for instances when we had multiple within-  
236 species observations, we reduced the observations to one per species to retain equal weights for  
237 each species. In such instances, the average of the hydraulic parameters associated with that  
238 species were calculated and used for the unique species analysis.

## 239 **Acknowledgements**

240 First, the authors would like to thank Lord Pisces. We also thank the Atlantic Salmon  
241 Conservation Foundation and New Brunswick Innovation Foundation for funding support.  
242 AMM was funded by New Brunswick's Wildlife Trust Fund. We would also like to thank those  
243 scientists whom conducted the studies that underpinned this research.

## 244 **Funding**

245 Atlantic Salmon Conservation Foundation; New Brunswick Innovation Foundation; New  
246 Brunswick's Wildlife Trust Fund.

## 247 **Author contributions**

248 Conceptualization: AMO'S; RA Cunjak; Methodology: AMO'S; JH; BW; TL; Investigation:  
249 AMO'S; AMM; Visualization: AMO'S; RJ; Funding acquisition: AMO'S, RA Curry, TL;

250 Project administration: AMO'S; Supervision: AMO'S; Writing – original draft: AMO'S; Writing  
251 – review & editing: AMO'S; AMM, RN, RJ, TL, BLK, BW, JH, KL, RA Curry, KMS, RN, RA  
252 Cunjak

### 253 **Competing interests**

254 The authors declare no competing interests.

### 255 **Materials & Correspondence**

256 Requests can be sent to Antóin M. O'Sullivan ([aosulliv@unb.ca](mailto:aosulliv@unb.ca)).

### 257 **Data availability**

258 The supporting data is available as supplementary information.

### 259 **References**

- 260 1. Keenleyside, M. H. A. *Diversity and Adaptation in Fish Behaviour*. **11**, (Springer Berlin  
261 Heidelberg, 1979).
- 262 2. Helfman, G. S., Collete, B. B., Facey, D. E. & Bowen, B. W. *The diversity of fishes*:  
263 *biology, evolution, and ecology*. (Wiley-Blackwell, 2009).
- 264 3. Kinne, O. & Kinne, E. M. Rates of Development in embryos of a cyprinodont fish  
265 exposed to different temperature-salinity-oxygen combinations.  
266 <https://doi.org/10.1139/z62-025> **40**, 231–253 (1962).
- 267 4. Rombough, P. J. Oxygen as a constraining factor in egg size evolution in salmonids.  
268 <https://doi.org/10.1139/f07-047> **64**, 692–699 (2007).
- 269 5. Su, G. *et al.* Human impacts on global freshwater fish biodiversity. *Science (80-. )*. **371**,  
270 835–838 (2021).
- 271 6. Manny, B. A. *et al.* A scientific basis for restoring fish spawning habitat in the St. Clair  
272 and Detroit Rivers of the Laurentian Great Lakes. *Restor. Ecol.* **23**, 149–156 (2015).
- 273 7. Cooke, S. J. & Schreer, J. F. Determination of fish community composition in the  
274 untempered regions of a thermal effluent canal-the efficacy of a fixed underwater  
275 videography system. *Environ. Monit. Assess.* **73**, 109–129 (2002).
- 276 8. Clausen, R. & York, R. Global biodiversity decline of marine and freshwater fish: A  
277 cross-national analysis of economic, demographic, and ecological influences. *Soc. Sci.*  
278 *Res.* **37**, 1310–1320 (2008).
- 279 9. Vörösmarty, C. J. *et al.* Global threats to human water security and river biodiversity. *Nat.*  
280 *2010 4677315* **467**, 555–561 (2010).
- 281 10. Long, K. I. The effects of redd site selection and redd geometry on the survival of  
282 incubating Okanagan sockeye eggs. (University of New Brunswick, 2007).
- 283 11. Moir, H. ., Soulsby, C. & Youngson, A. . Hydraulic and sedimentary controls on the  
284 availability and use of Atlantic salmon (*Salmo salar*) spawning habitat in the River Dee

- 285 system, north-east Scotland. *Geomorphology* **45**, 291–308 (2002).
- 286 12. Sargent, R. C. Paternal care and egg survival both increase with clutch size in the fathead  
287 minnow, *Pimephales promelas*. *Behav. Ecol. Sociobiol.* 1988 231 **23**, 33–37 (1988).
- 288 13. Steinhart, G. B., Marschall, E. A. & Stein, R. A. Round Goby Predation on Smallmouth  
289 Bass Offspring in Nests during Simulated Catch-and-Release Angling. *Chang. Publ.*  
290 *Wiley* **133**, 121–131 (2011).
- 291 14. Taylor, G. K., Nudds, R. L. & Thomas, A. L. R. Flying and swimming animals cruise at a  
292 Strouhal number tuned for high power efficiency. *Nat.* 2003 4256959 **425**, 707–711  
293 (2003).
- 294 15. Eloy, C. Optimal Strouhal number for swimming animals. *J. Fluids Struct.* **30**, 205–218  
295 (2012).
- 296 16. Termini, D. Experimental analysis of the effect of vegetation on flow and bed shear stress  
297 distribution in high-curvature bends. *Geomorphology* **274**, 1–10 (2016).
- 298 17. Jr., N. M. H. *Transport simulation of striped bass eggs in the Congaree, Wateree, and*  
299 *Santee rivers, South Carolina. Water-Resources Investigations Report* (1991).  
300 doi:10.3133/WRI914088
- 301 18. Andrews, S. N., Dadswell, M. J., Buhariwalla, C. F., Linnansaari, T. & Curry, R. A.  
302 Looking for Striped Bass in Atlantic Canada: The Reconciliation of Local, Scientific, and  
303 Historical Knowledge. *Northeast. Nat.* **26**, 1 (2019).
- 304 19. Faber, D. J. & McAllister, D. E. Development of Fishes of the Mid-Atlantic Bight. An  
305 Atlas of egg, larval and juvenile stages. <https://doi.org/10.1139/f79-107> **36**, 706–707  
306 (2011).
- 307 20. Moir, H. J., Soulsby, C. & Youngson, A. Hydraulic and sedimentary characteristics of  
308 habitat utilized by Atlantic salmon for spawning in the Girnock Burn, Scotland. *Fish.*  
309 *Manag. Ecol.* **5**, 241–254 (1998).
- 310 21. Goode, J. R. *et al.* Potential effects of climate change on streambed scour and risks to  
311 salmonid survival in snow-dominated mountain basins. *Hydrol. Process.* **27**, 750–765  
312 (2013).
- 313 22. Tonina, D. T. & Buffington, J. M. B. M. A three-dimensional model for analyzing the  
314 effects of salmon redds on hyporheic exchange and egg pocket habitat.  
315 <https://doi.org/10.1139/F09-146> **66**, 2157–2173 (2009).
- 316 23. Mills, C. A. The attachment of dace, *Leuciscus leuciscus* L., eggs to the spawning  
317 substratum and the influence of changes in water current on their survival. *J. Fish Biol.*  
318 **19**, 129–134 (1981).
- 319 24. Roseman, E. F. *et al.* Lake sturgeon response to a spawning reef constructed in the Detroit  
320 river. *J. Appl. Ichthyol.* **27**, 66–76 (2011).
- 321 25. Tonina, D. & Buffington, J. M. Hyporheic exchange in gravel bed rivers with pool-riffle  
322 morphology: Laboratory experiments and three-dimensional modeling. *Water Resour.*

- 323            *Res.* **43**, 1421 (2007).
- 324    26.    Magliozzi, C., Grabowski, R. C., Packman, A. I. & Krause, S. Toward a conceptual  
325            framework of hyporheic exchange across spatial scales. *Hydrol. Earth Syst. Sci.* **22**, 6163–  
326            6185 (2018).
- 327    27.    Buffington, J. M. & Tonina, D. Hyporheic Exchange in Mountain Rivers II: Effects of  
328            Channel Morphology on Mechanics, Scales, and Rates of Exchange. *Geogr. Compass* **3**,  
329            1038–1062 (2009).
- 330    28.    Near, T. J. *et al.* Resolution of ray-finned fish phylogeny and timing of diversification.  
331            *Proc. Natl. Acad. Sci.* **109**, 13698–13703 (2012).
- 332    29.    Chang, M., Wu, F., Miao, D. & Zhang, J. Discovery of fossil lamprey larva from the  
333            Lower Cretaceous reveals its three-phased life cycle. *Proc. Natl. Acad. Sci.* **111**, 15486–  
334            15490 (2014).
- 335    30.    Sandströ, O., Abrahamsson, I., Andersson, J. & Vetemaa, M. Temperature effects on  
336            spawning and egg development in Eurasian perch. *J. Fish Biol.* **51**, 1015–1024 (1997).
- 337    31.    Malzhan, A. M., Aberle, N., Clemmesen, C. & Boersma, M. Nutrient limitation of  
338            primary producers affects planktivorous fish condition — Sultan Qaboos University  
339            House of Expertise. *Mar. Sci. Fish.* **52**, 2062–2071 (2007).
- 340    32.    Curry, R. A. & Noakes, D. L. G. Groundwater and the selection of spawning sites by  
341            brook trout (*Salvelinus fontinalis*). *Can. J. Fish. Aquat. Sci.* **52**, 1733–1740 (1995).
- 342    33.    Newbury, R. *Stream Restoration Hydraulics: Project Casebook*. (Newbury Hydraulics,  
343            2016).
- 344    34.    Rivard-Sirois, C., Alex, K. & Squakin, J. *Aquatic Monitoring 2017 Penticton Channel*  
345            *Salmon Spawning Restoration Work*. (2018).
- 346    35.    Tedesco, P. A. *et al.* A global database on freshwater fish species occurrence in drainage  
347            basins. *Sci. Data* **2017 41** **4**, 1–6 (2017).
- 348
